# Supplementary material
Source: PubMed Central journal article supplement (PMC2651326)
Supplement: 0900181106_0900181106SI.pdf [file 0900181106_0900181106SI.pdf]

# Supporting Information

Yan *et al.* 10.1073/pnas.0900181106

Table S1. Sources of mice, cells and DNAs

| Subgenus        | Species                       | Previous species name or other designation | Geographic location           | Type  | Source             |
|-----------------|-------------------------------|--------------------------------------------|-------------------------------|-------|--------------------|
| <i>Coelomys</i> | <i>pahari</i>                 |                                            | Tak Province, Thailand        | mice  | Potter             |
| <i>Pyromys</i>  | <i>shortridgei</i>            |                                            |                               | cells | Rodgers            |
|                 | <i>platythrix*</i>            |                                            |                               | cells | Rodgers            |
|                 | <i>saxicola*</i>              |                                            | Mysore, India                 | mice  | Potter             |
| <i>Nannomys</i> | <i>minutoides*</i>            |                                            |                               | cells | Rodgers            |
|                 | <i>minutoides</i>             |                                            | Nairobi, Kenya                | mice  | Potter             |
|                 | <i>setulosus*</i>             |                                            | Nairobi, Kenya                | cells | Rodgers            |
|                 | <i>setulosus</i>              |                                            | Kanyawara, Uganda             | DNA   | d'Eustachio        |
|                 | <i>triton*</i>                |                                            | Fort Portal, Uganda           | DNA   | d'Eustachio        |
|                 | <i>gratus*</i>                |                                            | Fort Portal, Uganda           | DNA   | d'Eustachio        |
|                 | <i>bellus*</i>                |                                            | Fort Portal, Uganda           | DNA   | d'Eustachio        |
| <i>Mus</i>      | <i>cervicolor cervicolor*</i> |                                            | Loei Province, Thailand       | mice  | Potter             |
|                 | <i>cervicolor popaeus</i>     |                                            | Chantaburi Province, Thailand | mice  | Potter             |
|                 | <i>cookii*</i>                |                                            | Tak Province, Thailand        | mice  | Potter             |
|                 | <i>caroli*</i>                |                                            | Chonburi Province, Thailand   | mice  | Potter             |
|                 | <i>macedonicus*</i>           |                                            |                               | DNA   | Elliott            |
|                 | <i>dunni*</i>                 |                                            | India                         | cells | Lander             |
|                 | <i>spicilegus*</i>            | <i>hortulanus</i>                          | Halbturn, Austria             | mice  | Potter             |
|                 | <i>spicilegus</i>             | <i>hortulanus</i>                          | Pancevo, Yugoslavia           | mice  | Potter             |
|                 | <i>spretus</i>                |                                            | Morocco                       | mice  | Potter             |
|                 | <i>spretus</i>                |                                            | Puerto Real, Spain            | mice  | Potter             |
|                 | <i>spretus*</i>               |                                            | Puerto Real, Spain            | mice  | Jackson Laboratory |
|                 | <i>castaneus</i>              |                                            | Thailand                      | mice  | Potter             |
|                 | <i>castaneus*</i>             |                                            | Thailand                      | mice  | Jackson Laboratory |
|                 | <i>molossinus</i>             |                                            | Kyushu, Japan                 | mice  | Potter             |
|                 | <i>molossinus*</i>            |                                            | Fukuoka, Japan                | mice  | Roderick           |
|                 | <i>musculus*</i>              | Skive                                      | Skive, Denmark                | mice  | Potter             |
|                 | <i>musculus*</i>              | CzechI (CzI)                               | Morovia, Czechoslovakia       | mice  | Potter             |
|                 | <i>musculus</i>               | CzechII (CzII)                             | Slovakia, Czechoslovakia      | mice  | Potter             |
|                 | <i>musculus</i>               |                                            | Vejrumbro, Denmark            | mice  | Potter             |
|                 | <i>domesticus*</i>            | Lewes                                      | Lewes, DE                     | mice  | Potter             |
|                 | <i>domesticus</i>             | Centerville Light                          | Centerville, Maryland         | mice  | Potter             |
|                 | <i>domesticus</i>             |                                            | Watkins Farm                  | mice  | Potter             |
|                 | <i>domesticus</i>             | Havens Farm (HAF)                          | Davidsonville, Maryland       | mice  | Potter             |
|                 | <i>domesticus*</i>            | Cal                                        | California                    | mice  | Rasheed            |
|                 | <i>domesticus</i>             | J.J.Downs                                  | Ridgely, Maryland             | mice  | Potter             |
|                 | <i>domesticus*</i>            | <i>praetextus</i>                          |                               | cells | Rodgers            |
|                 | <i>domesticus</i>             | <i>poschiavinus</i>                        | Tirano, Italy                 | mice  | Potter             |

Sequenced samples are indicated with an asterisk. All other DNAs were analyzed by PCR for *Fv1*. Two subspecies of *cervicolor* were tested.

## Other Supporting Information Files

[Dataset S1](#)  
[SI Appendix](#)
